# Supplementary material
Source: PubMed Central journal article supplement (PMC2492646)
Supplement: pp.108.116863_1.pdf [file pp.108.116863_1.pdf]

## **Supplemental Figure Legends**

**Supplemental Video S1.** Expanding root epidermal cell expressing DRP1A-GFP imaged with VAEM. Speed is 5X real time.

**Supplemental Video S2.** Root epidermal cell expressing DRP1A-GFP grown on 10  $\mu\text{g}/\text{mL}$  fenpropimorph, a sterol synthesis inhibitor. Roots were immersed in  $\frac{1}{2}$  MS for imaging with VAEM. Speed is 5X real time.

**Supplemental Video S3.** Expanding root epidermal cell expressing DRP1A-mOrange and DRP1C-GFP imaged with VAEM. Speed is 5X real time.

**Supplemental Video S4.** Expanding root epidermal cell expressing DRP1A-mOrange and CLC-GFP imaged with VAEM. Speed is 5X real time.
